# Supplementary material
Source: PubMed Central journal article supplement (PMC5332303)
Supplement: NIHMS816529-supplement-10439_2016_1725_MOESM1_ESM.pdf [file NIHMS816529-supplement-10439_2016_1725_MOESM1_ESM.pdf]

# Intimal and Medial Proliferative Density - Normalized Dimensions

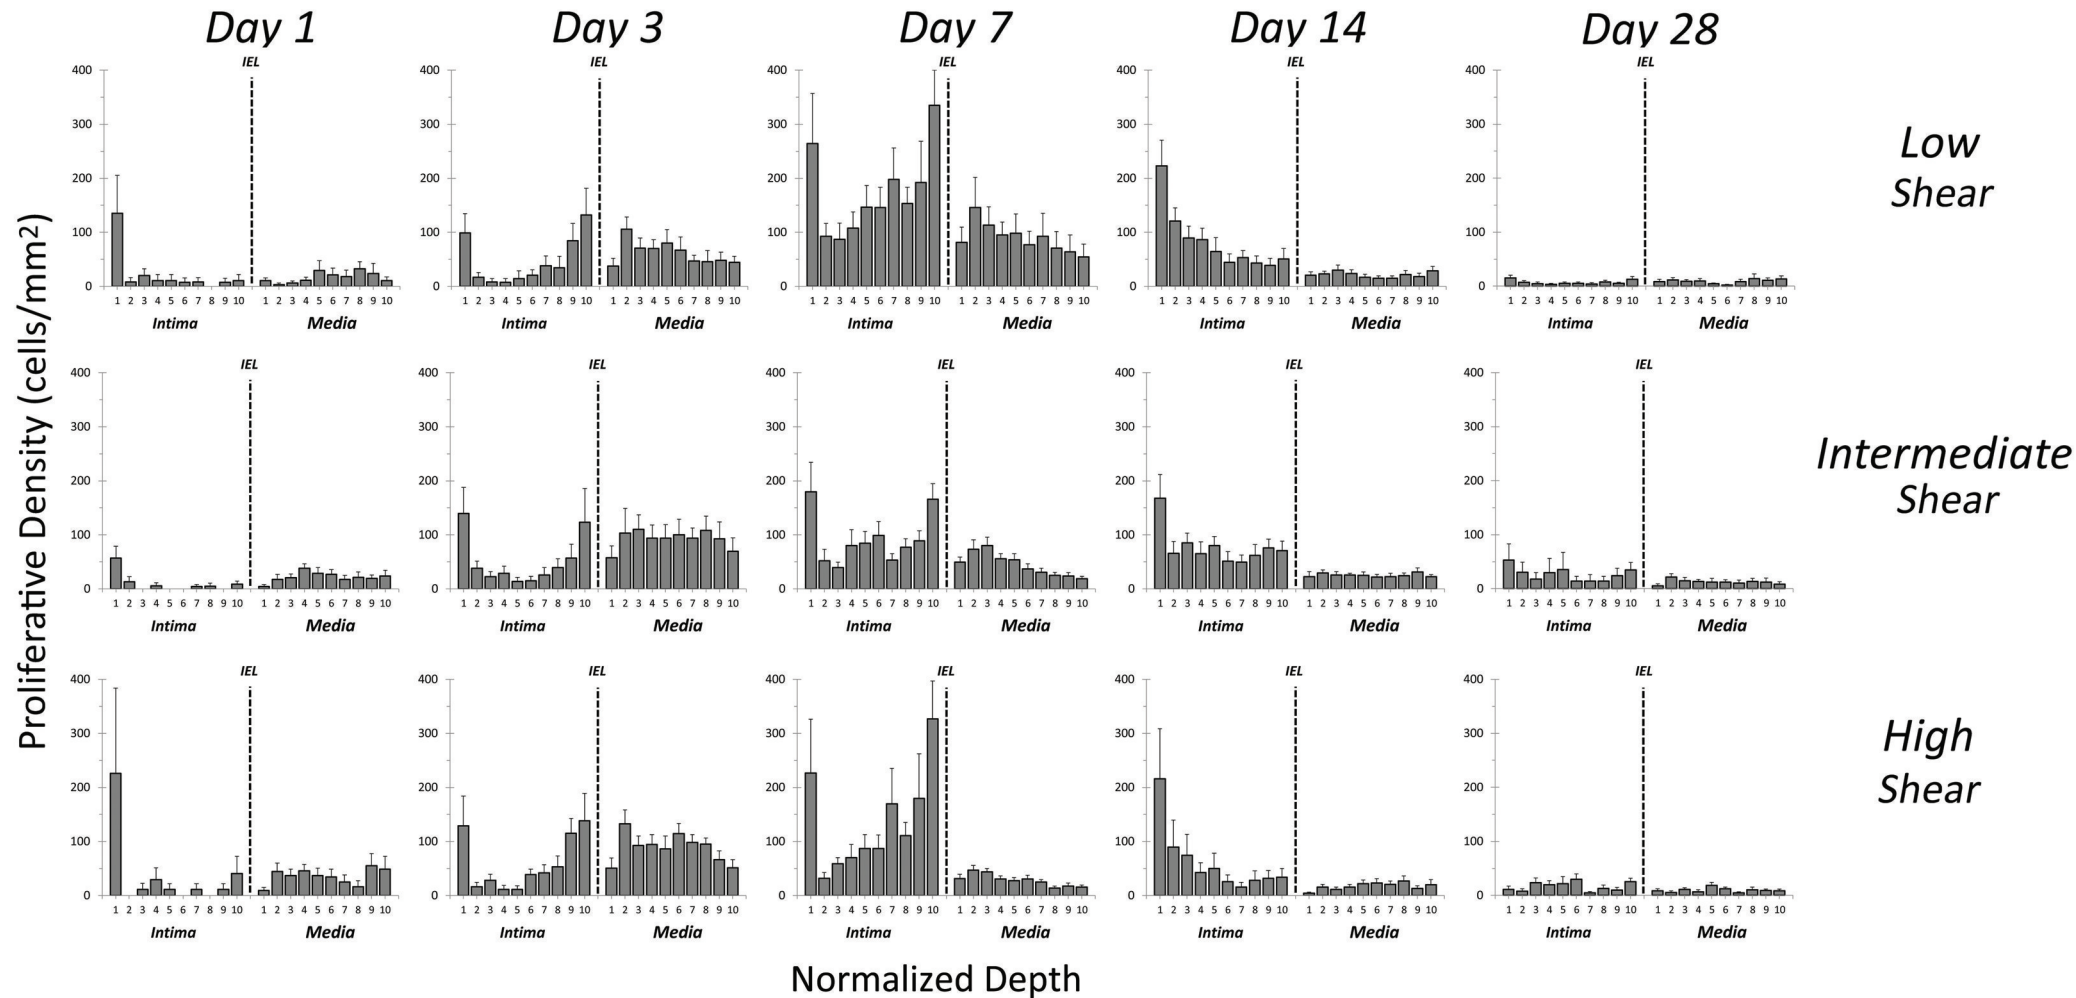

**Supplemental Figure 1.** Proliferative density within the intima and media as a function of normalized depth from the lumen or IEL, as a function flow condition, and time of implantation. Each compartment was divided into ten sections of equal thickness, with zero representing the lumen or IEL, in the intima or media respectively. The vertical dashed lines represent the location of the IEL. Note the proliferative density within the intima to be highly dependent on the depth within both the intimal and medial compartments ( $p < .001$ ; three-way ANOVA). Focusing on the most active time point (Day 7), increased proliferation is observed in the intima adjacent to the IEL, an observation that is independent of the flow condition ( $p < .001$ , IEL Position 10 vs all other positions; post-hoc analysis).

## ***Intimal Proliferative Density - Non-normalized Dimensions***

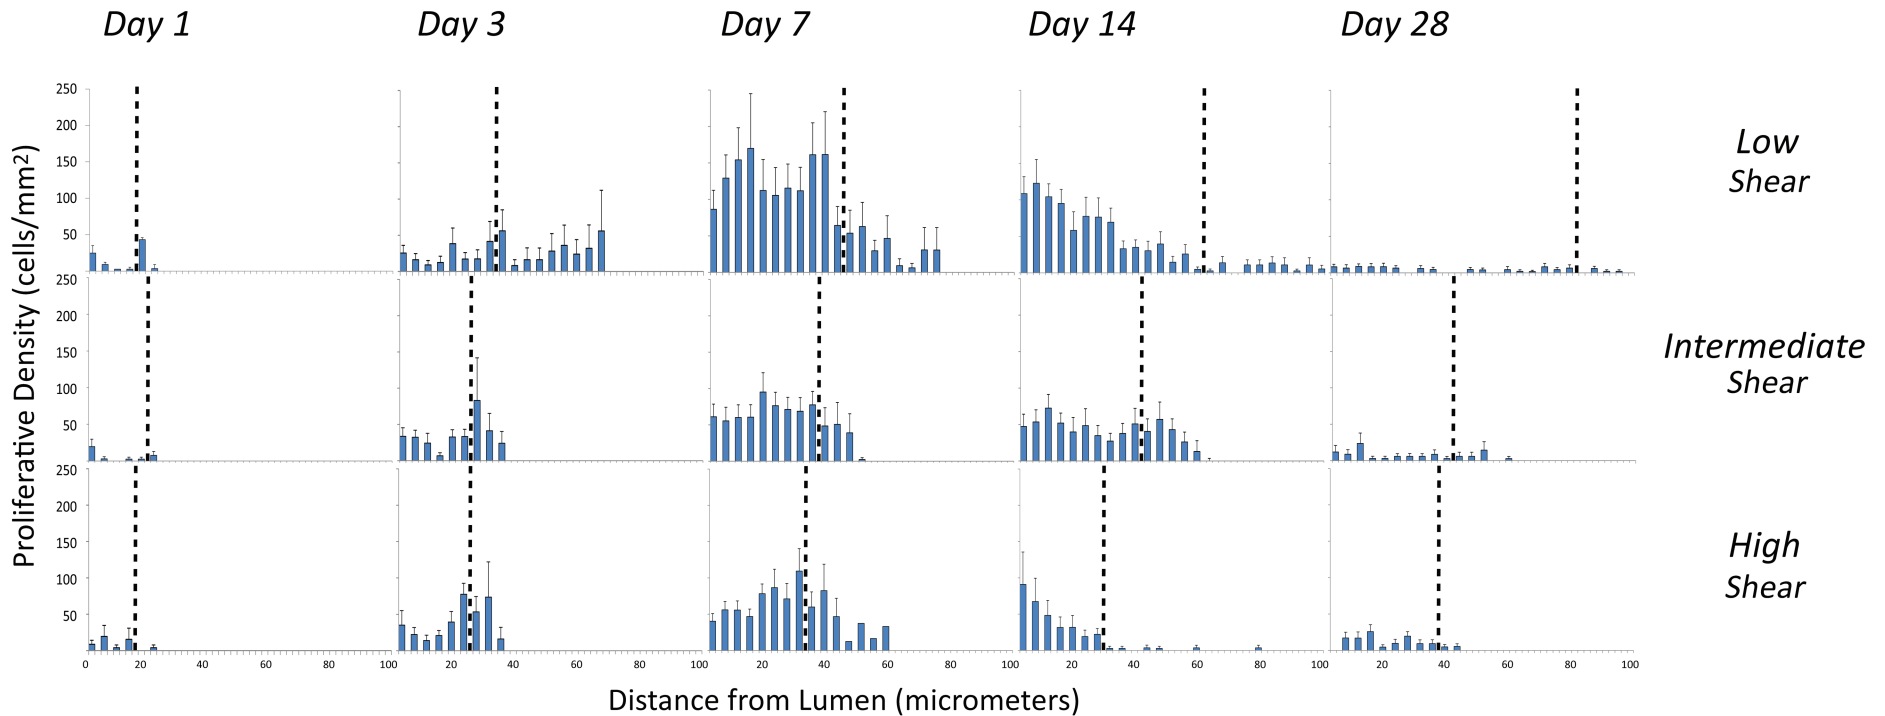

**Supplemental Figure 2.** Proliferative density within the intima as a function of distance from the lumen, flow condition, and time of implantation. Each bar represents the proliferative densities in 4 μm intervals starting at the lumen and radiating outward. The dotted lines represent the average distance of the internal elastic lamina (IEL) from the lumen. In contrast to Figure 7, non-normalized (actual) dimensions are used to illustrate the distribution of positive cells in the context of a changing intimal thickness.

## Medial Proliferative Density - Non-normalized Dimensions

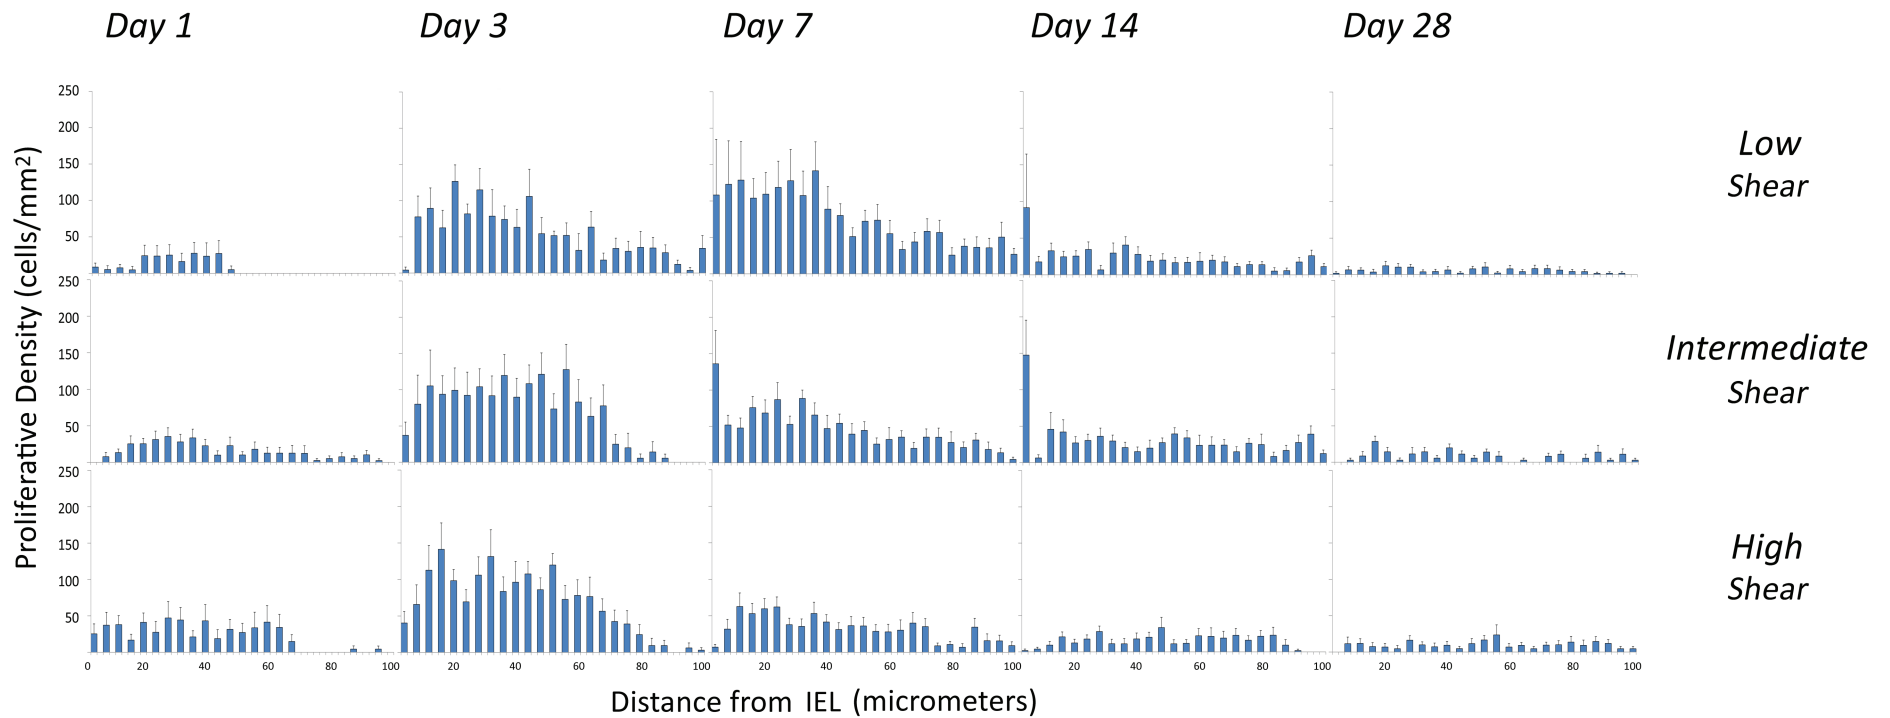

**Supplemental Figure 3.** Proliferative density within the media as a function of distance from the lumen, flow condition, and time of implantation. Each bar represents the proliferative densities in 4 μm intervals starting at the internal elastic lamina and radiating outward.

**Supplemental Table 1.** mRNA expression levels, as a function of implantation time and flow condition, for the 42 upstream regulators that have an influence on TAGLN, MYH11, and ACTA gene expression.

| Gene Symbol | Entrez Gene Name                                                         | Gene Accession Number | Post-operative Day / Flow condition |          |        |        |        |        |        |        |         |        |         |        |
|-------------|--------------------------------------------------------------------------|-----------------------|-------------------------------------|----------|--------|--------|--------|--------|--------|--------|---------|--------|---------|--------|
|             |                                                                          |                       | 0.08 High                           | 0.08 Low | 1 High | 1 Low  | 3 High | 3 Low  | 7 High | 7 Low  | 14 High | 14 Low | 28 High | 28 Low |
| ACTA1       | actin, alpha 1, skeletal muscle                                          | NM_001100             | -0.079                              | -0.551   | -0.112 | -0.683 | -1.168 | -0.706 | -1.275 | -1.327 | -0.519  | -0.277 | -0.668  | -0.454 |
| MYH11       | myosin, heavy chain 11, smooth muscle                                    | NM_002474             | -0.721                              | -0.647   | -2.427 | -2.127 | -3.635 | -2.833 | -3.631 | -3.569 | -1.757  | -0.635 | -1.042  | -0.466 |
| TAGLN       | transgelin                                                               | NM_001001522          | -0.756                              | -0.561   | -1.065 | -1.010 | -1.093 | -1.012 | -1.167 | -0.853 | -0.660  | 0.034  | -0.584  | -0.233 |
| ABCB4       | ATP binding cassette subfamily B member 4                                | NM_018849             | 0.195                               | 0.199    | 0.038  | 0.388  | -0.081 | 0.323  | 0.080  | -0.071 | 0.033   | -0.158 | 0.297   | 0.081  |
| ABLIM1      | actin binding LIM protein 1                                              | NM_006720             | -0.025                              | 0.182    | 0.045  | -0.066 | -0.164 | -0.201 | -0.062 | -0.074 | -0.011  | -0.176 | -0.062  | -0.058 |
| AZIN1       | antizyme inhibitor 1                                                     | NM_148174             | 0.476                               | 0.283    | 0.008  | -0.073 | 0.076  | -0.197 | -0.017 | 0.151  | -0.012  | -0.159 | -0.054  | -0.052 |
| BMP6        | bone morphogenetic protein 6                                             | NM_001718             | 0.227                               | 0.048    | -0.072 | 0.030  | -0.069 | -0.110 | 0.189  | 0.107  | 0.109   | -0.123 | 0.009   | -0.022 |
| BMPER       | BMP binding endothelial regulator                                        | NM_133468             | -0.138                              | -0.152   | -0.003 | 0.042  | 0.135  | 0.028  | 0.172  | 0.082  | 0.007   | -0.093 | -0.121  | -0.164 |
| CA4         | carbonic anhydrase IV                                                    | NM_000717             | -0.522                              | 0.330    | -0.801 | -0.464 | -0.123 | -0.572 | 0.146  | -0.151 | -0.324  | -0.448 | -0.091  | -0.242 |
| CACNB4      | calcium channel, voltage-dependent, beta 4 subunit                       | NM_001145798          | -0.100                              | -0.176   | -0.140 | -0.092 | -0.342 | -0.258 | -0.166 | -0.147 | -0.102  | -0.273 | -0.297  | -0.190 |
| CASZ1       | castor zinc finger 1                                                     | NM_001079843          | -0.137                              | -0.178   | -0.027 | -0.036 | -0.003 | -0.011 | -0.194 | -0.250 | -0.063  | 0.092  | -0.243  | -0.182 |
| CLIC5       | chloride intracellular channel 5                                         | NM_001114086          | -0.005                              | -0.080   | -0.032 | 0.083  | -0.064 | -0.030 | -0.035 | -0.160 | 0.003   | 0.139  | -0.181  | -0.279 |
| DGCR8       | DGCR8 microprocessor complex subunit                                     | NM_022720             | -0.096                              | -0.118   | 0.221  | 0.114  | -0.095 | 0.042  | -0.057 | -0.124 | -0.058  | 0.036  | -0.118  | -0.175 |
| DNASE1      | deoxyribonuclease I                                                      | NM_005223             | -0.031                              | -0.179   | 0.095  | 0.268  | -0.069 | 0.011  | -0.032 | -0.073 | 0.082   | 0.317  | 0.004   | 0.039  |
| DOCK7       | dedicator of cytokinesis 7                                               | NM_033407             | -0.264                              | 0.022    | -0.881 | -0.717 | 0.428  | 0.104  | 0.455  | 0.672  | 0.489   | 0.438  | 0.902   | 0.961  |
| FHL2        | four and a half LIM domains 2                                            | NM_001039492          | -0.490                              | -0.884   | -0.454 | -0.767 | -0.944 | -0.452 | -2.027 | -1.810 | -0.850  | 0.218  | -1.140  | -0.235 |
| GATA6       | GATA binding protein 6                                                   | NM_005257             | -0.013                              | 0.308    | 0.151  | 0.351  | 0.108  | 0.023  | -0.107 | -0.086 | -0.305  | 0.031  | -0.274  | -0.035 |
| GC          | group-specific component (vitamin D binding protein)                     | NM_000583             | 0.314                               | 0.235    | 0.239  | 0.437  | 0.248  | 0.231  | 0.342  | 0.372  | 0.328   | 0.049  | 0.221   | 0.165  |
| HEY2        | hes-related family bHLH transcription factor with YRPW motif 2           | NM_012259             | -0.426                              | -0.432   | -0.334 | -0.163 | -0.365 | -0.473 | -0.594 | -0.597 | -0.362  | -0.114 | -0.530  | -0.441 |
| IPP         | intracisternal A particle-promoted polypeptide                           | NM_001145349          | -0.497                              | -0.304   | -0.070 | 0.235  | 0.403  | 0.169  | 0.403  | 0.416  | 0.013   | 0.096  | 0.444   | 0.439  |
| IRX4        | iroquois homeobox 4                                                      | NM_016358             | -0.106                              | -0.180   | -0.092 | -0.319 | -0.178 | -0.133 | -0.181 | -0.276 | 0.042   | 0.071  | -0.199  | -0.278 |
| KCNMA1      | potassium channel, calcium activated large conductance subfamily M alpha | NM_001014797          | -0.004                              | 0.086    | 0.117  | 0.416  | 0.060  | 0.306  | -0.186 | -0.027 | -0.209  | 0.109  | -0.089  | 0.008  |
| KLF5        | Kruppel-like factor 5                                                    | NM_001730             | 1.766                               | 1.905    | 0.876  | 1.099  | 0.711  | 0.847  | 0.978  | 0.832  | 0.772   | 0.389  | 0.812   | 0.761  |
| LAMA2       | laminin subunit alpha 2                                                  | NM_001079823          | 0.140                               | 0.382    | -1.066 | -1.010 | -0.310 | -0.614 | 0.111  | -0.091 | 0.290   | -0.127 | 0.450   | 0.356  |
| LAMC1       | laminin subunit gamma 1                                                  | NM_002293             | -0.107                              | -0.475   | -0.695 | -0.722 | -0.322 | -0.194 | -0.440 | -0.228 | -0.018  | 0.478  | -0.156  | 0.016  |
| LDB3        | LIM domain binding 3                                                     | NM_001171610          | -0.019                              | -0.076   | -0.382 | -0.269 | -0.024 | -0.111 | 0.047  | -0.216 | 0.185   | -0.133 | -0.100  | -0.137 |
| MARCKSL1    | MARCKS-like 1                                                            | NM_023009             | 1.179                               | 0.492    | 1.494  | 1.330  | 0.509  | 0.831  | -0.038 | 0.090  | 0.419   | 0.636  | 0.142   | 0.187  |
| MDK         | midkine (neurite growth-promoting factor 2)                              | NM_002391             | 0.203                               | -0.091   | -0.066 | -0.001 | 0.018  | -0.064 | 0.061  | -0.002 | -0.026  | -0.081 | -0.124  | -0.173 |
| MKL2        | MKL/myocardin-like 2                                                     | NM_014048             | -0.581                              | -0.456   | -0.608 | -0.554 | -0.124 | -0.105 | -0.342 | -0.265 | 0.033   | -0.037 | -0.035  | -0.079 |
| MORF4L1     | mortality factor 4 like 1                                                | NM_006791             | -0.428                              | -0.339   | -0.125 | -0.153 | -0.255 | -0.176 | -0.691 | -0.664 | -0.327  | -0.333 | -0.288  | -0.135 |
| MYOC        | myocilin, trabecular meshwork inducible glucocorticoid response          | NM_000261             | 0.131                               | 0.227    | -0.095 | 0.038  | -0.094 | 0.173  | 0.004  | -0.076 | 0.139   | 0.065  | 0.077   | 0.099  |
| MYOCD       | myocardin                                                                | NM_001146313          | -0.522                              | 0.272    | -0.635 | -1.133 | -1.117 | -0.913 | -1.339 | -1.268 | -1.025  | -0.740 | -0.889  | -0.510 |
| NOTCH3      | notch 3                                                                  | NM_000435             | -0.927                              | -0.472   | -1.817 | -1.592 | -1.104 | -1.012 | -0.831 | -0.754 | 0.339   | 0.986  | 0.406   | 0.816  |
| NUP155      | nucleoporin 155kDa                                                       | NM_153485             | 0.024                               | 0.187    | 0.309  | 0.240  | 0.095  | -0.059 | 0.242  | 0.100  | 0.004   | 0.221  | 0.067   | 0.068  |
| PALLD       | palladin, cytoskeletal associated protein                                | NM_001166108          | -0.258                              | -0.135   | -0.262 | -0.460 | -0.322 | -0.246 | -0.383 | -0.323 | -0.267  | -0.055 | -0.272  | -0.349 |
| PDLIM5      | PDZ and LIM domain 5                                                     | NM_006457             | 0.867                               | 0.687    | 0.567  | 0.732  | 0.211  | 0.424  | -0.021 | -0.006 | 0.119   | 0.600  | 0.263   | 0.507  |
| PINX1       | PIN2/TERF1 interacting, telomerase inhibitor 1                           | NM_017884             | 0.011                               | -0.049   | 0.099  | 0.044  | 0.257  | 0.155  | -0.102 | -0.058 | -0.013  | 0.070  | -0.109  | -0.081 |
| PRKG1       | protein kinase, cGMP-dependent, type I                                   | NM_001098512          | -0.258                              | -0.322   | -0.132 | 0.041  | -0.301 | -0.240 | -0.468 | -0.426 | -0.421  | -0.315 | -0.411  | -0.435 |
| RLN2        | relaxin 2                                                                | NM_005059             | -0.160                              | 0.182    | 0.923  | 0.115  | 0.154  | -0.606 | 1.421  | 0.828  | 0.277   | -0.193 | 0.525   | -0.029 |
| RPS7        | ribosomal protein S7                                                     | NM_001011             | 0.458                               | -0.011   | 0.946  | 0.524  | 0.428  | 0.737  | -0.078 | 0.024  | 0.179   | 0.202  | 0.298   | 0.389  |
| RFXP1       | relaxin/insulin-like family peptide receptor 1                           | NM_021634             | 0.002                               | -0.182   | -0.287 | -0.433 | -0.306 | -0.263 | -0.563 | -0.614 | -0.326  | -0.230 | -0.461  | -0.530 |
| SV2A        | synaptic vesicle glycoprotein 2A                                         | NM_014849             | -0.173                              | 0.114    | -0.431 | -0.071 | -0.145 | -0.089 | -0.084 | -0.169 | -0.068  | -0.028 | -0.044  | -0.123 |
| TINF2       | TERF1 (TRF1)-interacting nuclear factor 2                                | NM_001099274          | -0.023                              | -0.151   | -0.143 | -0.172 | -0.233 | -0.246 | -0.333 | -0.479 | -0.174  | -0.157 | -0.406  | -0.327 |
| TNKS        | tankyrase, TRF1-interacting ankyrin-related ADP-ribose polymerase        | NM_003747             | -0.157                              | 0.014    | -0.199 | 0.080  | -0.215 | -0.185 | -0.006 | -0.121 | -0.007  | 0.128  | -0.228  | 0.021  |
| TPM1        | tropomyosin 1 (alpha)                                                    | NM_001018020          | -1.700                              | -1.678   | -2.066 | -2.106 | -2.567 | -1.724 | -2.816 | -2.262 | -1.915  | -0.875 | -1.480  | -0.831 |
